# Supplementary material
Source: publisher figshare collection journal article supplement (https://gsapubs.figshare.com/ndownloader/files/32798819)
Supplement: Supplementary file 1 [file 32798819]

## Sheet: Final 2
TABLE S2. U–PB LA–ICP–MS DATA FOR ZIRCONS FROM METAPELITE AND METAPSAMMITE.
		Isotope ratios							Age (Ma)
Sample		207Pb/206Pb	± 1σ	207Pb/235U	± 1σ	206Pb/238U	± 1σ		207Pb/206Pb	± 1σ	207Pb/235U	± 1σ	206Pb/238U	± 1σ		Th/U	Cond
16JS45 - Metapelite
16js19-1-2		0.06179	0.00076	0.08129	0.00072	0.69207	0.00765		666.8	26.08	534	4.59	503.8	4.26		0.617985	0.940056
16js19-1-4		0.05552	0.00061	0.06828	0.00059	0.52225	0.00505		432.8	24.23	426.7	3.37	425.8	3.57		0.00785644	0.997886
16js19-1-7		0.05555	0.00061	0.06916	0.0006	0.52934	0.00508		434.3	24.09	431.4	3.37	431.1	3.61		0.0169335	0.999304
16js19-1-12		0.06457	0.00072	0.07266	0.00063	0.6464	0.00634		760.3	23.32	506.3	3.91	452.2	3.78		0.0100376	0.880363
16js19-1-17		0.05657	0.00062	0.06753	0.00058	0.5264	0.00502		474.3	24.11	429.4	3.34	421.3	3.52		0.011547	0.980774
16js19-1-19		0.06262	0.0007	0.08164	0.00071	0.70442	0.00697		695.5	23.78	541.4	4.15	505.9	4.2		0.0683934	0.929828
16js19-1-22		0.05552	0.00059	0.06261	0.00054	0.47891	0.00443		433	23.49	397.3	3.04	391.5	3.26		0.0143777	0.985185
16js19-1-24		0.0555	0.00064	0.06937	0.0006	0.53042	0.00542		432	25.49	432.1	3.6	432.4	3.61		0.010254	0.999306
16js19-1-26		0.06357	0.00067	0.07649	0.00065	0.66994	0.00606		727.4	22.1	520.7	3.69	475.1	3.92		0.0458244	0.90402
16js19-1-29		0.09909	0.00105	0.19774	0.0017	2.69955	0.02477		1607.1	19.68	1328.3	6.8	1163.2	9.14		0.470156	0.858064
16js19-1-30		0.05562	0.00063	0.07233	0.00062	0.55425	0.00548		436.8	24.41	447.8	3.58	450.2	3.73		0.0660742	0.994669
16js19-1-31		0.05565	0.00061	0.06186	0.00053	0.47429	0.00451		437.9	23.66	394.1	3.11	387	3.21		0.0178831	0.981654
16js19-1-32		0.06681	0.0008	0.0851	0.00074	0.78329	0.00827		831.7	24.63	587.4	4.71	526.5	4.38		0.198829	0.88433
16js19-1-35		0.06631	0.00084	0.08471	0.00074	0.77388	0.00882		816.1	26.34	582	5.05	524.2	4.39		0.323705	0.889737
16js19-1-37		0.05514	0.00061	0.06813	0.00058	0.51756	0.005		417.8	24.37	423.5	3.35	424.9	3.52		0.00633663	0.996705
16js19-1-40		0.055	0.00061	0.07005	0.0006	0.5308	0.00514		412.1	24.39	432.3	3.41	436.5	3.6		0.0111705	0.990378
16js19-1-50		0.05848	0.00066	0.0705	0.0006	0.56801	0.00561		547.8	24.52	456.7	3.63	439.2	3.62		0.172689	0.960155
16js19-1-60		0.06195	0.00071	0.0744	0.00063	0.63505	0.00639		672.5	24.46	499.2	3.97	462.6	3.8		0.164014	0.920882
16js19-1-61		0.10579	0.0011	0.22948	0.00194	3.34479	0.0296		1728.1	19.01	1491.6	6.92	1331.8	10.17		0.364599	0.880012
16js19-1-63		0.05623	0.00064	0.07519	0.00064	0.5825	0.00576		460.8	25.1	466.1	3.7	467.3	3.82		0.530787	0.997432
17JS15 - Metapsammite
17JS15-01		0.0730686	0.000989838	1.67003	0.0243501	0.164711	0.00131568		1016.66	27.3175	997.196	9.28488	982.906	7.30132		0.493911	0.98
17JS15-02		0.0965083	0.0030073	3.17804	0.0902012	0.240597	0.00234961		1557.72	59.2575	1451.84	21.9437	1389.8	12.2321		0.49234	0.95
17JS15-03		0.0716237	0.0010126	1.52861	0.0233765	0.154006	0.00137189		975.93	29.6325	941.94	9.40884	923.38	7.67975		1.19226	0.98
17JS15-04		0.0706567	0.000988667	1.35554	0.0182976	0.138566	0.000989486		947.215	27.78	869.95	7.90954	836.547	5.62053		0.275905	0.96
17JS15-05		0.163546	0.00178191	10.3267	0.127326	0.455022	0.00376147		2494.45	17.44	2464.5	11.5365	2417.54	16.7161		0.0614693	0.98
17JS15-06		0.162862	0.00276496	10.4915	0.212051	0.466166	0.00675737		2487.03	28.705	2479.16	18.8125	2466.72	29.7406		0.733183	0.99
17JS15-07		0.0790635	0.00127123	2.15431	0.0402361	0.19586	0.0019744		1173.77	31.4775	1166.44	12.9764	1153.04	10.6614		0.377824	0.98
17JS15-08		0.0600991	0.00124511	0.822412	0.0174078	0.0988063	0.000948638		605.575	44.435	609.393	9.70786	607.409	5.57507		0.0707003	0.99
17JS15-09		0.0815549	0.00153039	2.38949	0.0462166	0.212282	0.00249068		1235.18	37.0325	1239.46	13.8707	1240.96	13.2613		0.671427	0.99
17JS15-10		0.0821315	0.0013553	2.31404	0.0449103	0.202848	0.00230011		1249.99	31.945	1216.6	13.7848	1190.6	12.3437		0.503424	0.97
17JS15-11		0.0582358	0.000870297	0.686041	0.0117277	0.0849123	0.000807553		538.925	33.33	530.419	7.07198	525.377	4.80676		0.457219	0.99
17JS15-12		0.0714179	0.000998545	1.6327	0.0281023	0.164652	0.00168551		968.515	28.86	982.9	10.8592	982.578	9.34446		0.462669	0.99
17JS15-13		0.0719899	0.00142702	1.82744	0.03564	0.183662	0.00150305		987.04	39.66	1055.36	12.819	1086.95	8.20687		1.04916	0.97
17JS15-14		0.167477	0.00277029	11.1361	0.186271	0.481101	0.00440999		2532.41	27.7775	2534.58	15.6796	2532.06	19.2429		1.06005	0.989
17JS15-15		0.160643	0.00193273	10.7298	0.139919	0.482063	0.0035479		2462.65	20.37	2500.01	12.2306	2536.24	15.4927		0.861441	0.98
17JS15-16		0.0744706	0.0014555	1.69615	0.0349904	0.164491	0.00148894		1053.71	39.9725	1007.08	13.1953	981.685	8.25953		0.293673	0.97
17JS15-17		0.0756514	0.000986424	1.93947	0.0312364	0.185106	0.00199138		1087.04	30.555	1094.81	10.8157	1094.81	10.8483		0.304898	0.9
17JS15-18		0.148496	0.00202186	8.76085	0.122207	0.426161	0.00304832		2328.71	23.1525	2313.43	12.8097	2288.39	13.8341		1.33432	0.98
17JS15-19		0.0734259	0.00117853	2.01427	0.0320929	0.198214	0.0013521		1025.61	31.4825	1120.33	10.8376	1165.72	7.30151		0.53987	0.96
17JS15-20		0.0711784	0.000875626	1.5823	0.0201906	0.160613	0.00118729		962.65	24.0775	963.275	7.9661	960.182	6.61493		0.268699	0.99
17JS15-21		0.071101	0.000859247	1.80341	0.0242298	0.18287	0.00127081		961.11	-7.56	1046.7	8.80472	1082.63	6.95031		0.304374	0.96
17JS15-22		0.0988769	0.00171399	3.53669	0.0726202	0.25822	0.00305504		1602.78	32.56	1535.46	16.287	1480.73	15.6727		0.538388	0.96
17JS15-23		0.107316	0.00210573	4.00683	0.0907513	0.269665	0.00358034		1754.62	36.265	1635.58	18.4379	1539.1	18.1973		0.689813	0.93
17JS15-24		0.0593128	0.000802314	0.870342	0.0143064	0.105823	0.00115664		588.915	29.6225	635.753	7.77875	648.446	6.75174		0.0535992	0.98
17JS15-25		0.159942	0.00211993	10.0428	0.143705	0.453439	0.00411289		2455.24	22.5275	2438.72	13.3174	2410.53	18.2882		0.926991	0.98
17JS15-26		0.156128	0.00172864	9.19577	0.114285	0.424576	0.00319231		2413.89	18.825	2357.69	11.4939	2281.22	14.4981		0.759855	0.96
17JS15-1-1		0.25778	0.00262	19.1822	0.17167	0.54013	0.00478		3233.2	15.93	3051	8.64	2784	19.99		1.04844	0.904095
17JS15-1-2		0.15993	0.00167	9.38454	0.08691	0.42593	0.00379		2454.9	17.58	2376.3	8.5	2287.3	17.12		2.27981	0.961089
17JS15-1-3		0.07034	0.00074	1.4737	0.0138	0.15207	0.00134		938.3	21.48	919.6	5.66	912.6	7.52		0.0532992	0.99233
17JS15-1-4		0.09716	0.00109	3.44703	0.03462	0.25752	0.0023		1570.2	20.85	1515.2	7.91	1477.2	11.8		0.998278	0.974276
17JS15-1-5		0.07234	0.0008	1.51628	0.01504	0.15213	0.00135		995.6	22.36	937	6.07	912.9	7.55		1.20721	0.973601
17JS15-1-6		0.08893	0.00093	2.88068	0.02674	0.23513	0.00207		1402.5	11.1	1376.9	7	1361.3	10.83		0.918112	0.98854
17JS15-1-7		0.07215	0.00083	1.5333	0.01576	0.15425	0.00137		990.1	23.11	943.8	6.32	924.7	7.66		2.36564	0.979345
17JS15-1-8		0.07877	0.0009	2.07259	0.02113	0.19098	0.0017		1166.4	22.36	1139.8	6.98	1126.7	9.19		1.50048	0.988373
17JS15-1-9		0.11375	0.0013	5.26775	0.05378	0.33612	0.00302		1860.2	20.45	1863.7	8.71	1868	14.55		0.609935	0.997698
17JS15-1-10		0.07145	0.00089	1.54169	0.01739	0.15662	0.00141		970.2	25.12	947.2	6.95	938	7.83		0.40503	0.990192
17JS15-1-11		0.07201	0.00085	1.68829	0.01791	0.17016	0.00151		986.4	23.78	1004.1	6.76	1013	8.35		1.48698	0.991214
17JS15-1-12		0.07169	0.00092	1.34988	0.01587	0.13667	0.00123		977.1	26.03	867.5	6.86	825.8	6.98		0.570189	0.949504
17JS15-1-13		0.17595	0.0019	12.5019	0.11976	0.5157	0.00461		2615.1	17.89	2642.9	9.01	2680.9	19.6		2.39036	0.985826
17JS15-1-14		0.07182	0.00092	1.53742	0.01803	0.15536	0.0014		981	25.97	945.5	7.21	930.9	7.8		2.51086	0.984316
17JS15-1-15		0.07558	0.0008	1.8874	0.01768	0.18123	0.00159		1084.1	21.16	1076.7	6.22	1073.7	8.67		1.56117	0.997206
17JS15-1-16		0.16567	0.00174	10.0572	0.0923	0.44058	0.00387		2514.4	17.5	2440	8.48	2353.2	17.33		1.02572	0.963114
17JS15-1-17		0.09686	0.00099	2.47528	0.02204	0.18547	0.00161		1564.5	19.05	1264.8	6.44	1096.8	8.77		0.52357	0.846827
17JS15-1-18		0.07577	0.00094	1.63266	0.01833	0.15637	0.00139		1089.1	24.68	982.9	7.07	936.6	7.78		1.95274	0.950566
17JS15-1-19		0.0723	0.00074	1.57742	0.01407	0.15835	0.00138		994.3	20.69	961.4	5.54	947.6	7.65		0.56187	0.985437
17JS15-1-20		0.07587	0.0008	1.87539	0.01733	0.17939	0.00156		1091.7	20.98	1072.4	6.12	1063.6	8.54		0.35966	0.991726
17JS15-1-22		0.07084	0.00074	1.51931	0.01385	0.15564	0.00135		952.9	21.23	938.2	5.58	932.5	7.53		0.69664	0.993887
17JS15-1-23		0.06103	0.0007	0.83081	0.00845	0.09879	0.00086		640.3	24.4	614.1	4.69	607.3	5.07		0.319807	0.988803
17JS15-1-25		0.06359	0.00074	1.02435	0.01069	0.1169	0.00102		728.1	24.59	716.1	5.36	712.7	5.91		0.106705	0.995229
17JS15-1-27		0.1352	0.00136	6.10348	0.05296	0.32762	0.00282		2166.6	17.45	1990.7	7.57	1826.8	13.71		0.131881	0.91028
17JS15-1-28		0.09836	0.00102	3.6734	0.03321	0.27102	0.00235		1593.3	19.32	1565.6	7.22	1546	11.9		0.814621	0.987322
17JS15-1-29		0.07386	0.00078	1.77968	0.01634	0.17486	0.00151		1037.7	20.82	1038.1	5.97	1038.8	8.3		0.685893	0.999326
17JS15-1-30		0.0781	0.00082	2.03759	0.01866	0.18932	0.00164		1149.5	20.76	1128.2	6.24	1117.7	8.87		0.549929	0.990606
17JS15-1-31		0.15399	0.0016	7.43611	0.06654	0.35043	0.00303		2390.7	17.54	2165.3	8.01	1936.6	14.46		1.01617	0.881906
17JS15-1-32		0.05899	0.00064	0.69016	0.00652	0.0849	0.00073		566.7	23.39	532.9	3.92	525.3	4.35		0.689485	0.985532
17JS15-1-33		0.06885	0.00102	1.29842	0.01767	0.13686	0.00124		894.1	30.22	845	7.8	826.9	7.02		0.464779	0.978111
17JS15-1-34		0.06854	0.00102	1.41115	0.01926	0.14939	0.00135		885.1	30.34	893.6	8.11	897.6	7.59		1.68975	0.995544
17JS15-1-35		0.07519	0.00115	1.77282	0.02502	0.17109	0.00157		1073.6	30.4	1035.6	9.16	1018.1	8.63		1.27818	0.982811
17JS15-1-36		0.07117	0.0008	1.5403	0.01523	0.15704	0.00136		962.4	22.83	946.6	6.09	940.3	7.57		1.46626	0.9933
17JS15-1-37		0.18122	0.00184	11.8415	0.10283	0.47415	0.00406		2664	16.73	2592	8.13	2501.7	17.75		0.69474	0.963905
17JS15-1-38		0.07412	0.00078	1.80836	0.01653	0.17703	0.00152		1044.8	21.18	1048.5	5.98	1050.7	8.31		0.546463	0.997906
17JS15-1-39		0.08978	0.00098	2.97134	0.02818	0.24014	0.00207		1420.8	20.66	1400.3	7.21	1387.4	10.77		0.877367	0.990702
17JS15-1-40		0.05688	0.00087	0.6183	0.00871	0.07887	0.00071		486.2	33.74	488.8	5.47	489.4	4.22		2.95758	0.998774
17JS15-1-41		0.09771	0.001	3.6317	0.03185	0.2697	0.0023		1580.8	19.06	1556.5	6.98	1539.3	11.68		1.45695	0.988826
17JS15-1-42		0.07808	0.00081	1.98278	0.01758	0.18426	0.00157		1148.9	20.41	1109.7	5.99	1090.2	8.56		0.596273	0.982113
